# Supplementary material for: Risk perception, safer sex practices and PrEP enthusiasm: barriers and facilitators to oral HIV pre-exposure prophylaxis in Black African and Black Caribbean women in the UK
Source: PubMed Central journal article supplement — Sex Transm Infect. 2020 Jun 12;96(5):349–54. doi: 10.1136/sextrans-2020-054457 (PMC7402557; doi:10.1136/sextrans-2020-054457), 2020-06-12
Supplement: sextrans-2020-054457supp002.pdf [file sextrans-2020-054457supp002.pdf]

| Level of Influence | Theme                     | Participant                                 | Q# | Quote                                                                                                                                                                                                                                                                                                                                                                                                                                                                                                                                                                                                                                                                                                           |
|--------------------|---------------------------|---------------------------------------------|----|-----------------------------------------------------------------------------------------------------------------------------------------------------------------------------------------------------------------------------------------------------------------------------------------------------------------------------------------------------------------------------------------------------------------------------------------------------------------------------------------------------------------------------------------------------------------------------------------------------------------------------------------------------------------------------------------------------------------|
| Individual         | SRH Service Knowledge     | HIV negative woman, older than 30, London   | 1  | I: But how do you broach that conversation [about testing] with [your partner]?<br>P: Um, I think to me it's – like, I will say the relationship I'm in is 13 years long. But in the beginning, we really sat down and talked about it and being himself, coming from African background, and I am from South Africa, which is the country that has a lot of HIV. So, I came over to this country with knowledge already, and I couldn't just take that risk. Of going with anybody anyhow.                                                                                                                                                                                                                     |
|                    | PrEP Enthusiasm           | HIV negative woman, older than 30, Glasgow  | 2  | That way I'm so happy about PrEP – pills... It just gets you away from the distance, from the HIV. So, I'm so happy. I think this one is helpful. If we can just tell the people about this, it can be very, very, very helpful for all the women. Because many, many women are complaining about the condom.                                                                                                                                                                                                                                                                                                                                                                                                   |
|                    | Trust in new technologies | HIV negative woman, younger than 30, London | 3  | P: [PrEP is a] really good, good idea but what about getting pregnant [in a serodiscordant relationship]? ...If she take it, she's preventing herself to get – but she's getting the sperm from her husband who have it. So definitely the baby will have it. If she take it every day, she will not have it.<br>I: She will not have it and the baby will not have it. ...that's actually the first place it was used, couples who wanted to have a baby but one was HIV positive. So the other partner could take PrEP and then they wouldn't pass HIV to each other or the baby.<br>P: But there is still, like, that's very scary because anytime it can happen. I know, but not everything 99% guaranteed. |
|                    |                           | HIV positive woman, older than 30, London   | 4  | Yeah. I know that some men, depending on how strong they are, they may get the virus. Depending on how weak they are. Because people may have health issues in their bodies. And they may not be all that strong. But even though I may be undetectable, I keep telling myself, 'It depends on the person.' If the person is weak with his – poor or, or weak. Ailments in the body. He might get a disease.                                                                                                                                                                                                                                                                                                    |

|                |                 |                                             |   |                                                                                                                                                                                                                                                                                                                                                                                                                                                                                                                                                                                                                                                                                         |
|----------------|-----------------|---------------------------------------------|---|-----------------------------------------------------------------------------------------------------------------------------------------------------------------------------------------------------------------------------------------------------------------------------------------------------------------------------------------------------------------------------------------------------------------------------------------------------------------------------------------------------------------------------------------------------------------------------------------------------------------------------------------------------------------------------------------|
|                | Risk Assessment | HIV positive woman, older than 30, Glasgow  | 5 | I: Do you think there's any point before that diagnosis, where someone could have intervened and said 'PrEP is available', or, 'Maybe you should test for HIV,' or would you not have been receptive to that messaging?<br>P: No, that's a hard one... to a certain extent, I think if the awareness was there, I could have taken it. But having said that as well, I was at that age where I thought, you know, I was untouchable.                                                                                                                                                                                                                                                    |
|                |                 | HIV positive woman, older than 30, Glasgow  | 6 | I: Do you think... Obviously you're giving these women [HIV prevention] information now. Do you think if someone had given you this information before you were diagnosed, you would have been open to it?<br>P: Very much. I tell you that I had this information, I would still be living without HIV. Because I would have been able to stand for myself and empower myself and tell them, 'You know what, to hell with what you think.' This is my life. ...Because personally I know, my husband is promiscuous. But what could I do? Nothing. Because you're married, the priest united you to the husband.                                                                       |
| Inter-personal | Peer Networks   | HIV positive woman, older than 30, London   | 7 | I do a chat with my friends. With my peers who are living with HIV. Not necessary peers who are living with HIV only. Even some of my girlfriends who are HIV free, I would say, 'Hey, I've met this guy, he's not very keen on condom sex, what do we think? Do we even consider it? Do we not consider it?'                                                                                                                                                                                                                                                                                                                                                                           |
|                |                 | HIV negative woman, younger than 30, London | 8 | We all know each other; I know their husbands; they're all my husband's friends. I'm sure as well they're not doing anything outside of marriage. But, in general, I think that sometimes I say, 'Oh, I went to sexual health clinic.' [Mimics a friend's voice]'Oh, why did you go there?' 'I have thrush. But I did HIV, I did gonorrhoea and this and that.' But, yeah, they still don't talk much about it. They talk about sometimes like other things like my friend had, [mimics a friend's voice] 'Oh, I had this, is that normal? I have, like, itching.' I say, 'Go to sexual healthy clinic, there is one in [name of place], go and get checked there.' And she went there. |
|                |                 | HIV negative woman,                         | 9 | I think the NHS that we have is an absolute privilege, and – but I think just because of certain stressors that they're under, you can go there – for example, my husband having certain health issues, and go there and you just go around                                                                                                                                                                                                                                                                                                                                                                                                                                             |

|  |                        |                                             |    |                                                                                                                                                                                                                                                                                                                                                                                                                                                                                                                                                                                                                                                 |
|--|------------------------|---------------------------------------------|----|-------------------------------------------------------------------------------------------------------------------------------------------------------------------------------------------------------------------------------------------------------------------------------------------------------------------------------------------------------------------------------------------------------------------------------------------------------------------------------------------------------------------------------------------------------------------------------------------------------------------------------------------------|
|  |                        | younger than 30, London                     |    | and around and around in circles and the time, waiting times, are so strained that you don't really have that time and so you don't feel like they actually, really care. And so I wouldn't go to them to actually find out really important things. I would have to find someone else and this is where having a couple of friends who are doctors, yeah, sometimes I'll ask them but only if it's, like, the last resort after speaking to like family or using Google.                                                                                                                                                                       |
|  |                        | HIV positive woman, older than 30, Glasgow  | 10 | It's not like quite segregated as such. What happens is people are there, like, the area I live in for example, there are not any other black and ethnic minorities. There are not many there... Maybe I will count how many people are there. But the interaction is not there. The inter- we are there in the communities, but we are not integrating, we are not living together. We are living there but we are not really connected.                                                                                                                                                                                                       |
|  | Peer networks and HIV  | HIV negative woman, younger than 30, London | 11 | You might advise your friend to do this [HIV] test because she's your friend and [she] goes back to tell the boyfriend, [mimics a friend's voice] 'This is what my friend has said.' The boy might take offense, thinking indirectly I'm telling others that he might have some sort of disease, and that can bring serious trouble.                                                                                                                                                                                                                                                                                                            |
|  | Having a 'cover'       | HIV positive woman, older than 30, London   | 12 | You can find a way of approaching ...you're doing a project. To your friends you can say, 'By the way, I'm doing this project... Can you people volunteer?'... Then they're going to go back and tell their boyfriends... And that's going to give them a wakeup call. [Mimics a friend's boyfriend's voice] 'Oh no, I've been up to no good. I better go and get [PrEP].'                                                                                                                                                                                                                                                                      |
|  | Intimacy with partners | HIV positive woman, older than 30, Glasgow  | 13 | P: I normally [test for STIs], when you have a partner... you have to do it frequently. And also, when you want to encourage him to do it because you like to do both. So I think for my understanding, if you encourage your partner, both of you, you do frequently testing, it motivates him to be clean, to stay safe all the time, That's my understanding. I don't know how other people view it, but to me I said... You know what, if I can say 'Every three months, we need to go do testing. I'm not saying you are cheating and stuff but there might be accident, maybe you are helping someone and you have a cut, blood to blood, |

|                       |                      |                                            |    |                                                                                                                                                                                                                                                                                                                                                                                                                                                                                                                                                                                                                                                                                                                                                                   |
|-----------------------|----------------------|--------------------------------------------|----|-------------------------------------------------------------------------------------------------------------------------------------------------------------------------------------------------------------------------------------------------------------------------------------------------------------------------------------------------------------------------------------------------------------------------------------------------------------------------------------------------------------------------------------------------------------------------------------------------------------------------------------------------------------------------------------------------------------------------------------------------------------------|
|                       |                      |                                            |    | <p>you never know. Just for the sake so that if you have it, take care of yourself quickly and these days there are a lot of good medication that can help you.'</p> <p>I: Do you normally go every three months?</p> <p>P: Not exactly, but I'm just saying, you can do five months, six months, twice a year that's what I can say. I do twice a year because I'm motivating him also to stay clean knowing, 'I must only-' whatever, even there are some evil things in their head. Always play it safe.</p>                                                                                                                                                                                                                                                   |
| Perceived Environment | Community Stigma     | HIV positive woman, older than 30, London  | 14 | <p>I made a conscious decision to leave the corporate world to get a job in the HIV sector before I opened up [to talking about HIV], because my backstory was, 'Oh, I know the information because I work in the sector.' And people would buy that. So I completely understand that it is difficult for women who have the information to talk about HIV prevention to suddenly say in her church group, talking about PrEP .... [Others will] be like, 'Where do you know this from? You're not working in the sector.' And it's very difficult for a woman to then say, 'Actually I'm living with HIV and I'm empowered ...' It's that risk that they don't know if that friendship circle is going to be sustainable once that information is out there.</p> |
|                       |                      | HIV positive woman, older than 30, London  | 15 | <p>My two [female] friends I know who are definitely on PrEP, they did not want to have their data stored somewhere else. They just wanted to keep that very private. And they thought that – they know that they got the right information and they did – it was mainly a decision of keeping their privacy. That they didn't want to go to a clinic and have the information stored, even if it's with a unique identifier. They didn't want that. One of them, she said to me, 'You know what, I'm very well respected at work professionally, and I wouldn't want this to get out.'</p>                                                                                                                                                                       |
|                       | Institutional stigma | HIV negative woman, older than 30, Glasgow | 16 | <p>It's like [health care workers] not want to get close to you, neither talk to you or touch you. Depend on the person you face.</p>                                                                                                                                                                                                                                                                                                                                                                                                                                                                                                                                                                                                                             |
|                       |                      | HIV negative                               | 17 | <p>If you go to the GP in England, they will tell you it's up to you. You know? We will go to GP, obviously, to get any guide. But when you talk to them</p>                                                                                                                                                                                                                                                                                                                                                                                                                                                                                                                                                                                                      |

|        |                                   |                                             |    |                                                                                                                                                                                                                                                                                                                                                                                                                                                                                                                                                                                                         |
|--------|-----------------------------------|---------------------------------------------|----|---------------------------------------------------------------------------------------------------------------------------------------------------------------------------------------------------------------------------------------------------------------------------------------------------------------------------------------------------------------------------------------------------------------------------------------------------------------------------------------------------------------------------------------------------------------------------------------------------------|
|        |                                   | woman, older than 30, London                |    | about the pill, they are happy to give you the pill, because they don't want people having more kids. So we decide not to go to see the doctor. We decide by ourself, because they will give us straight away the pill. If you even tell [them] the [side effects], they will tell you, 'Change the other pill.' They are not telling you, 'Oh, okay, leave it now,' because they don't want you have a baby.                                                                                                                                                                                           |
|        | Shifting norms around safer sex   | HIV negative woman, younger than 30, London | 18 | Safe sex for me can mean – engaging in sexual relationships, relations, with people as long as you kind of know all - you have all your – you have all the information about what are your reproductive and sexual rights, and kind of having an open conversation with the person with consent and understanding each other's needs and boundaries and things like that. But then also kind of, if you're choosing protection, you have that conversation about whether you're choosing protection or not or what your thing is. Just having a broad open conversation with a person and case-by-case. |
| Policy | Representation                    | HIV negative woman, older than 30, London   | 19 | [Looking at a PrEP for Women brochure] I think I heard of PrEP for men, gay. But you know, sometimes when they said gay, it's something that I never really put my head around it and really get my interest. Because something, you look at it and it capture your interest and you just want to learn more. But now it touch home. Women (laughs).                                                                                                                                                                                                                                                    |
|        |                                   | HIV positive woman, older than 30, London   | 20 | In here, there are specific clinics that have been chosen to run the trial and it's – and I think a lot of women are feeling already alienated from the [PrEP Impact] trial because not only did it allocate 8,000 places for men who have sex with men and 2,000 for others, they went and took another 1000 places for men who have sex with men. Yes, men who have sex with men mobilized and they demanded and they were there and they filled the places. So I think a lot of women already feel they are treading on the toes of men who have sex with men.                                       |
|        | Current PrEP provision guidelines | HIV negative woman, older than              | 21 | Whereas everyone will just go to a GP for information or if they're unwell for a drop-in centre... sexual health clinic, not everyone's going to go there and it's not... As wide reached to people that probably would need it. Because they all think, 'Okay, sexual health... I'd rather go to my GP where there is no stigma attached, I don't have to hide or anything like that.' It's good to be in                                                                                                                                                                                              |

|  |  |               |  |                                                                                                                                                                                                                                                                                                            |
|--|--|---------------|--|------------------------------------------------------------------------------------------------------------------------------------------------------------------------------------------------------------------------------------------------------------------------------------------------------------|
|  |  | 30,<br>London |  | there but I think starting at the GP service, it's really, really need. Because people in the UK just go to their GPs, even for colds (laughs) and that's why it's so stretched, they're going for actually rubbish reasons. So the fact that they go and they give them this information, if it's needed. |
|--|--|---------------|--|------------------------------------------------------------------------------------------------------------------------------------------------------------------------------------------------------------------------------------------------------------------------------------------------------------|
